# Supplementary material for: The Crystal Structure and Small-Angle X-Ray Analysis of CsdL/TcdA Reveal a New tRNA Binding Motif in the MoeB/E1 Superfamily
Source: PLOS journal article supplement (doi:10.1371/journal.pone.0118606), 2015-04-21
Supplement: S4 (10.1371/journal.pone.0118606.s004) [file journal.pone.0118606.s004]

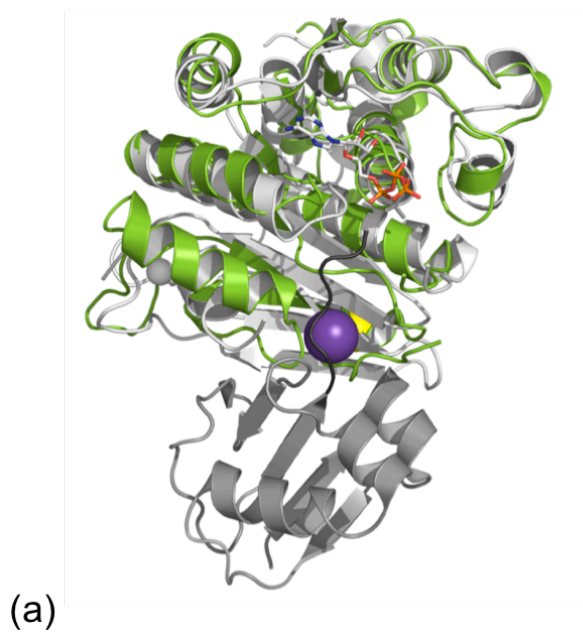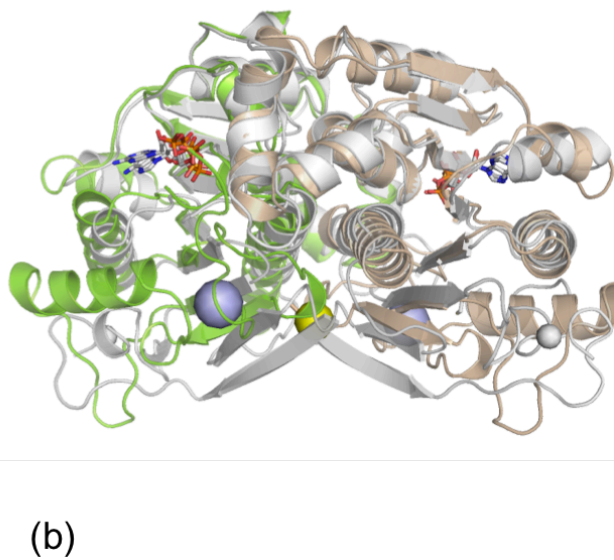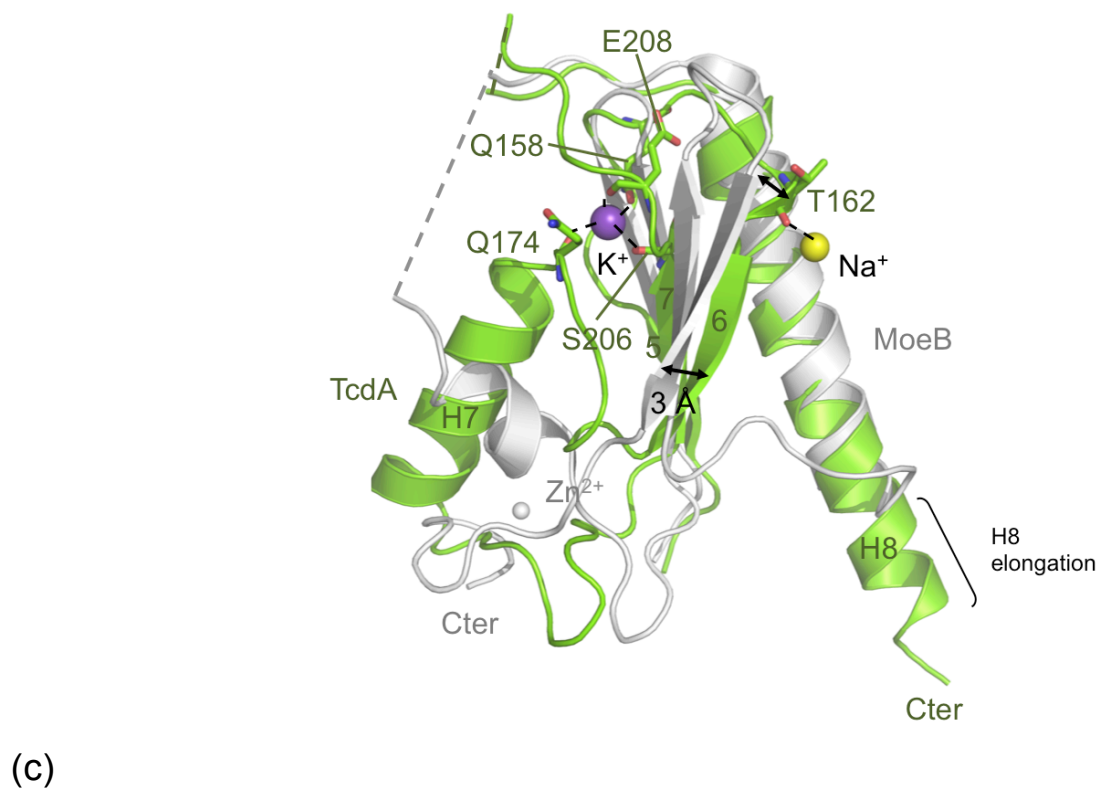

**Supplementary Information:** The Crystal Structure and Small-Angle X-Ray Analysis of CsdL/TcdA reveal a new tRNA binding motif in the MoeB/E1 superfamily. M. López-Esteva, A. Ardá, M. Savko, A. Round, W.E. Shepard, M. Bruix, M. Coll, F.J. Fernández, J. Jiménez-Barbero, M.C. Vega. *PLoS ONE*, 2015.

**Figure S4. Structural comparison of TcdA and MoeB.** (a) Superposition of a TcdA monomer (green) and MoeB-MoeD (light and dark shades of grey; PDB 1JWA [1]). (b) Superposition of a TcdA dimer (chains in green and grey) with MoeB (brown; PDB 1JWA [1]), highlighting the similar E1-like fold as well as the differences in fold topology and metal binding sites.  $K^+$  and  $Zn^{2+}$  are shown as a purple or gray spheres, respectively. (c) Detail of the superposition of the divergent C-terminal domain of TcdA with that of MoeB, highlighting the major structural differences. In particular, differences in the strands  $\beta 5$ ,  $\beta 6$  and  $\beta 7$  are responsible for the organization of two new metal-binding sites absent in all known E1-like activating enzymes, a  $K^+$  ion binding per TcdA chain and an interfacial  $Na^+$  pocket. Missing residues in mobile loops are indicated by dashed lines.

1. Lake MW, Wuebbens MM, Rajagopalan KV, Schindelin H (2001) Mechanism of ubiquitin activation revealed by the structure of a bacterial MoeB-MoaD complex. *Nature* 414: 325-329.

**Supplementary Information:** The Crystal Structure and Small-Angle X-Ray Analysis of CsdL/TcdA reveal a new tRNA binding motif in the MoeB/E1 superfamily. M. López-Esteva, A. Ardá, M. Savko, A. Round, W.E. Shepard, M. Bruix, M. Coll, F.J. Fernández, J. Jiménez-Barbero, M.C. Vega. *PLoS ONE*, 2015.
